# Supplementary material for: AB11O16(OH)2 (A = K and Cs): interpenetrating 2D layers with large birefringence
Source: Royal Society of Chemistry journal article supplement (doi:10.1039/d0ce01569e), 2020-11-20
Supplement: d0ce01569e1.pdf [file d0ce01569e1.pdf]

***Supporting Information for***

**AB<sub>11</sub>O<sub>16</sub>(OH)<sub>2</sub> (A = K and Cs): Interpenetrating 2D Layer with Large Birefringence**

Zhen Chen,<sup>a,b#</sup> Jingyu Guo,<sup>a,b#</sup> Shujuan Han,<sup>a</sup> Hao Zeng,<sup>a</sup> Zhihua Yang<sup>a</sup> and Shilie Pan<sup>\*a</sup>

<sup>a</sup>Key Laboratory of Functional Materials and Devices for Special Environments, Xinjiang Technical Institute of Physics & Chemistry, Chinese Academy of Sciences; Xinjiang Key Laboratory of Electronic Information Materials and Devices, 40-1 South Beijing Road, Urumqi 830011, China.

<sup>b</sup>University of Chinese Academy of Sciences, Beijing 100049, China,

\*Corresponding authors, E-mails: [slpan@ms.xjb.ac.cn](mailto:slpan@ms.xjb.ac.cn)

---

## Experimental Section

### Synthesis.

KCl (Shanghai Aladdin Reagent Co., Ltd., 99.5%), CsCl (Tianjin Baishi Chemical Reagent Co., Ltd, 99.5%), B<sub>2</sub>O<sub>3</sub> (Shanghai Aladdin Reagent Co., Ltd., 99.0%) and H<sub>3</sub>BO<sub>3</sub> (Shanghai Aladdin Reagent Co., Ltd., 99.5%) were of analytical grade and obtained from commercial sources without further purification.

Crystals of KB<sub>11</sub>O<sub>16</sub>(OH)<sub>2</sub> (KBOH) and CsB<sub>11</sub>O<sub>16</sub>(OH)<sub>2</sub> (CBOH) were grown in closed system by high-temperature solution method. A mixture of B<sub>2</sub>O<sub>3</sub> (0.278 g, 4 mmol), HBO<sub>3</sub> (0.062 g, 1 mmol) and KCl (0.075 g, 1 mmol) was placed in a fused-silica tube (Φ10 mm x 100 mm) which was washed by using deionized water. Then it was flame-sealed under a high vacuum of 10<sup>-3</sup> Pa. Subsequently, the tube was moved into a muffle furnace and heated to 400 °C at a rate of 20 °C/h, held at this temperature for 36 h, and then cooled to 300 °C with a rate of 1.0 °C/h, finally cooled to room temperature with a rate of 10 °C/h. CsB<sub>11</sub>O<sub>16</sub>(OH)<sub>2</sub> (CBOH) was obtained through the similar process and the maximum temperature was 370 °C. The mixture was weighed as follows: CsCl (0.168 g, 1 mmol), HBO<sub>3</sub> (0.092 g, 1.5 mmol) and B<sub>2</sub>O<sub>3</sub> (0.278 g, 4 mmol).

The polycrystalline sample of KBOH was obtained from a reaction of KCl (0.746 g, 10 mmol), B<sub>2</sub>O<sub>3</sub> (0.618 g, 10 mmol) and H<sub>3</sub>BO<sub>3</sub> (3.481 g, 50 mmol). The above materials were fully ground in an agate mortar, then transferred to a tidy quartz tube which was flame-sealed under 10<sup>-3</sup> Pa. The mixture was heated to 220 °C with a rate of 10 °C/h, held at this temperature for 72 h, then slowly dropped to room temperature. The synthesis of the polycrystalline was followed by this chemical reaction:

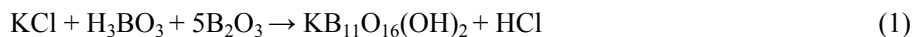

Meanwhile, we also tried to synthesize the polycrystalline sample of CBOH using the same method in the different temperatures; however, these attempts were failed.

### Powder X-ray Diffraction.

The pure phase was examined by the powder X-ray diffraction (XRD) carried on a Bruker D2 PHASER diffractometer with Cu K $\alpha$  radiation ( $\lambda = 1.54056 \text{ \AA}$ ) operating at room temperature. The pattern was taken in the  $2\theta$  range from 5° to 70° with a scan step width of 0.02° and a fixed counting time of 1s per step.

### Single Crystal X-ray Diffraction.

The APEX II CCD X-ray diffractometer with monochromatic Mo K $\alpha$  radiation ( $\lambda = 0.71073 \text{ \AA}$ ) was utilized to record the X-ray diffraction data for colorless KB<sub>11</sub>O<sub>16</sub>(OH)<sub>2</sub> and CsB<sub>11</sub>O<sub>16</sub>(OH)<sub>2</sub> single crystal at 296(2) K. The direct methods and SHELXTL system were used to solve and refine the crystal structure, respectively.<sup>1</sup> Use full matrix least-squares techniques to determine all atom positions, and the final least-squares refinement is on  $F_o^2$  with data having  $F_o^2 \geq 2\sigma(F_o^2)$ . The structure was checked for missed symmetry elements using PLATON.<sup>2</sup> The information of crystal data and structural refinements is summarized in Tables S1. Similarly, Tables S2 and S3 listed the atomic coordinates, site occupancy factors (SOF), equivalent isotropic displacement parameters, and selected bond lengths and angles, respectively.

### Infrared Measurement.

The coordination of B atoms was determined by measuring infrared (IR) spectroscopy

---

measured on a Shimadzu IRAffinity-1 Fourier transform IR spectrometer. The sample was mixed thoroughly with dried KBr (~ 6 mg of the sample and 600 mg of KBr), and the IR spectrum was collected in the range from 400 to 4000  $\text{cm}^{-1}$  with a resolution of 2  $\text{cm}^{-1}$ .

#### **UV-Vis-NIR Diffuse Reflectance Measurement.**

A Shimadzu SolidSpec-3700DUV spectrophotometer was used to collect the UV-Vis-NIR diffuse reflectance data of the reported samples, and the measurement range extended from 190 to 2600 nm at room temperature.<sup>3</sup>

#### **Thermal Analysis.**

Thermal gravimetric analysis (TGA) and differential scanning calorimetry (DSC) of KBOH were performed on a simultaneous NETZSCH STA 449C instrument at a temperature range of 40-800  $^{\circ}\text{C}$  with a rate of 5  $^{\circ}\text{C}\cdot\text{min}^{-1}$  in an atmosphere of flowing  $\text{N}_2$ . When the sample is heated to 110  $^{\circ}\text{C}$ , the TG curve shows the weight loss (hydroxyl begins to decompose), and the absorption peak on the DSC curve at 335  $^{\circ}\text{C}$  corresponds to the melting of the decomposed sample of KBOH (Figure S7).

#### **Birefringence.**

The birefringence was measured by polarizing microscope (ZEISS Axio Scope. A1) with Berek compensator, the wavelength of the light source was 546 nm. In order to improve the precision of birefringence, thin and transparent lamellar crystals were screened under a microscope for measurement before scanning.

The formula for calculating the birefringence can be given by the following equation:

$$R = V_0(t_g - t_p) = d(V_0/V_g - V_0/V_p) = d(N_g - N_p) = d \cdot \Delta n \quad (2)$$

Here,  $R$  represents the optical path difference,  $V_0$  represents in the speed of light in air,  $V_g$  and  $V_p$  represent the propagation speed of light through the crystal,  $t_g$  and  $t_p$  mean the time required to pass through the wafer in slow and fast light,  $\Delta n$  means the birefringence,  $N_g$  and  $N_p$  denote the refractive index of light in a crystal, and  $d$  denotes the thickness of the crystal.

#### **Theoretical Calculation.**

The density functional theory method was utilized for calculating the band structure, the total/partial density of states (T/PDOS) for KBOH and CBOH, which were performed by the plane wave pseudopotential implemented in the CASTEP code.<sup>4</sup> The cutoff energy of plane waves was set to 830 eV. The region integration of Brillouin was carried out using the Monkhorst-Pack18 scheme, with the grid of  $k$ -point being  $2 \times 2 \times 1$  and the spacing of  $k$ -point being 0.07  $\text{\AA}^{-1}$ .<sup>5</sup> The Perdew-Burke-Ernzerhof (PBE) method in generalized gradient approximation (GGA) was chosen to describe the exchange-correlation potential,<sup>6</sup> and the norm conserving pseudopotential (NCP) was used for the following valence electrons, K:  $4s^1$ , Cs:  $6s^1$ , B:  $2s^2 2p^1$ , O:  $2s^2 2p^4$ , H:  $1s^1$ . Other calculation parameters were set as the default values in the CASTEP.

**Table S1.** Crystal data and structure refinement for  $\text{KB}_{11}\text{O}_{16}(\text{OH})_2$  and  $\text{CsB}_{11}\text{O}_{16}(\text{OH})_2$ .

| Empirical formula                                                | $\text{KB}_{11}\text{O}_{16}(\text{OH})_2$                         | $\text{CsB}_{11}\text{O}_{16}(\text{OH})_2$                        |
|------------------------------------------------------------------|--------------------------------------------------------------------|--------------------------------------------------------------------|
| Temperature                                                      | 296(2) K                                                           |                                                                    |
| Crystal system, space group                                      | Monoclinic, $C2/c$                                                 |                                                                    |
| Unit cell dimensions ( $\text{\AA}$ )                            | $a = 14.163(17)$<br>$b = 10.101(12)$<br>$c = 10.664(12)$           | $a = 14.183(7)$<br>$b = 10.192(5)$<br>$c = 11.348(5)$              |
| Volume ( $\text{\AA}^3$ )                                        | 1460(3)                                                            | 1576.7(13)                                                         |
| Z, Calculated density ( $\text{g/cm}^3$ )                        | 4, 2.038                                                           | 4, 2.300                                                           |
| Absorption coefficient ( $\text{mm}^{-1}$ )                      | 0.468                                                              | 2.446                                                              |
| F(000)                                                           | 880                                                                | 1040                                                               |
| Theta range for data collection ( $^\circ$ )                     | 2.510 - 25.000                                                     | 2.495 - 24.997                                                     |
| Limiting indices                                                 | $-16 \leq h \leq 16$ , $-11 \leq k \leq 12$ , $-12 \leq l \leq 11$ | $-16 \leq h \leq 15$ , $-10 \leq k \leq 12$ , $-13 \leq l \leq 13$ |
| Reflections collected / unique                                   | 3675 / 1284 [ $R_{\text{int}} = 0.0542$ ]                          | 3800 / 1391 [ $R_{\text{int}} = 0.1037$ ]                          |
| Completeness to theta                                            | 99.70%                                                             | 99.90%                                                             |
| Data / restraints / parameters                                   | 1284 / 1 / 141                                                     | 1391 / 1 / 142                                                     |
| Goodness-of-fit on $F_o^2$                                       | 1.045                                                              | 0.932                                                              |
| Final R indices [ $F_o^2 > 2(F_c^2)$ ] <sup>a</sup>              | $R_1 = 0.0443$ , $wR_2 = 0.0913$                                   | $R_1 = 0.0488$ , $wR_2 = 0.0762$                                   |
| R indices (all data) <sup>a</sup>                                | $R_1 = 0.0652$ , $wR_2 = 0.1014$                                   | $R_1 = 0.0663$ , $wR_2 = 0.0811$                                   |
| Largest diff. peak and hole ( $\text{e} \cdot \text{\AA}^{-3}$ ) | 0.277 and - 0.387                                                  | 1.449 and - 1.445                                                  |

<sup>a</sup> $R_1 = \Sigma ||F_o| - |F_c|| / \Sigma |F_o|$  and  $wR_2 = [\Sigma w(F_o^2 - F_c^2)^2 / \Sigma wF_o^4]^{1/2}$  for  $F_o^2 > 2\sigma(F_o^2)$ .

**Table S2a.** Atomic coordinates ( $\times 10^4$ ), equivalent isotropic displacement parameters ( $\text{\AA}^2 \times 10^3$ ) and bond valence sum (BVS) calculations for  $\text{KB}_{11}\text{O}_{16}(\text{OH})_2$ .  $U(\text{eq})$  is defined as one third of the trace of the orthogonalized  $U_{ij}$  tensor.

| Atoms | x       | y        | z        | $U(\text{eq})$ | BVS  |
|-------|---------|----------|----------|----------------|------|
| K(1)  | 5000    | 2002(1)  | 2500     | 34(1)          | 1.10 |
| B(1)  | 2241(3) | 1252(3)  | 1758(4)  | 17(1)          | 3.05 |
| B(2)  | 4718(3) | 2537(4)  | 5380(4)  | 19(1)          | 3.06 |
| B(3)  | 3557(3) | 4302(4)  | 4259(4)  | 21(1)          | 3.07 |
| B(4)  | 4049(3) | 863(3)   | -1004(4) | 17(1)          | 3.08 |
| B(5)  | 5000    | -1453(5) | 2500     | 15(1)          | 3.09 |
| B(6)  | 2785(3) | 189(4)   | 98(4)    | 20(1)          | 3.05 |
| O(1)  | 2861(2) | 1211(2)  | 981(2)   | 21(1)          | 2.05 |
| O(2)  | 4321(2) | 3445(2)  | 4410(2)  | 24(1)          | 2.15 |
| O(3)  | 4425(1) | 2313(2)  | 6435(2)  | 19(1)          | 1.89 |
| O(4)  | 1531(2) | 292(2)   | 1645(2)  | 25(1)          | 1.99 |
| O(5)  | 4497(2) | 1856(2)  | -140(2)  | 22(1)          | 2.12 |
| O(6)  | 3356(2) | 76(2)    | -707(2)  | 23(1)          | 2.08 |
| O(7)  | 5677(1) | -599(2)  | 2070(2)  | 18(1)          | 2.04 |
| O(8)  | 2311(2) | 2291(2)  | 2574(2)  | 25(1)          | 1.52 |
| O(9)  | 2923(2) | 4233(2)  | 5001(2)  | 25(1)          | 2.02 |
| H(1)  | 1908(3) | 2239(3)  | 3039(4)  | 62(15)         | 0.74 |

**Table S2b.** Atomic coordinates ( $\times 10^4$ ), equivalent isotropic displacement parameters ( $\text{\AA}^2 \times 10^3$ ) and bond valence sum (BVS) calculations for  $\text{CsB}_{11}\text{O}_{16}(\text{OH})_2$ .  $U(\text{eq})$  is defined as one third of the trace of the orthogonalized  $U_{ij}$  tensor.

| Atoms | x       | y         | z        | $U(\text{eq})$ | BVS   |
|-------|---------|-----------|----------|----------------|-------|
| Cs(1) | 5000    | 2279(1)   | 2500     | 31(1)          | 1.191 |
| B(1)  | 2258(6) | 1181(8)   | 1619(7)  | 24(2)          | 3.002 |
| B(2)  | 4734(5) | 2594(8)   | 5518(6)  | 23(2)          | 3.069 |
| B(3)  | 3575(6) | 4339(8)   | 4446(7)  | 26(2)          | 3.053 |
| B(4)  | 4052(5) | 934(8)    | -1062(7) | 23(2)          | 3.092 |
| B(5)  | 5000    | -1487(11) | 2500     | 22(3)          | 2.988 |
| B(6)  | 2787(5) | 241(9)    | 0(7)     | 29(2)          | 3.017 |
| O(1)  | 2887(3) | 1184(4)   | 874(4)   | 25(1)          | 2.087 |
| O(2)  | 4341(3) | 3502(5)   | 4617(4)  | 29(1)          | 2.205 |
| O(3)  | 4424(3) | 2359(4)   | 6493(3)  | 24(1)          | 1.855 |
| O(4)  | 1543(3) | 252(5)    | 1476(4)  | 29(1)          | 2.003 |
| O(5)  | 4484(3) | 1911(4)   | -286(3)  | 28(1)          | 2.144 |
| O(6)  | 3363(3) | 124(5)    | -777(4)  | 32(1)          | 1.987 |
| O(7)  | 5672(3) | -651(4)   | 2069(4)  | 24(1)          | 1.996 |
| O(8)  | 2371(3) | 2152(5)   | 2470(4)  | 32(1)          | 1.514 |
| O(9)  | 2936(3) | 4296(5)   | 5151(4)  | 36(1)          | 1.984 |
| H(1)  | 2130(6) | 2030(10)  | 3080(5)  | 120(4)         | 0.733 |

**Table S3a.** Selected bond lengths (Å) and angles (°) for  $\text{KB}_{11}\text{O}_{16}(\text{OH})_2$ .

|                    |            |                    |           |
|--------------------|------------|--------------------|-----------|
| K(1)-O(1)          | 3.098(4)   | B(3)#3-O(4)        | 1.370(4)  |
| K(1)-O(1)#1        | 3.098(4)   | B(3)-O(4)#5        | 1.370(4)  |
| K(1)-O(2)#1        | 2.887(3)   | B(3)-O(9)          | 1.360(4)  |
| K(1)-O(2)          | 2.887(3)   | B(4)#4-O(7)        | 1.330(4)  |
| K(1)-O(5)          | 2.701(4)   | B(4)-O(5)          | 1.385(4)  |
| K(1)-O(5)#1        | 2.701(4)   | B(4)-O(7)#4        | 1.330(4)  |
| K(1)-O(7)#1        | 2.878(4)   | B(4)-O(6)          | 1.369(4)  |
| K(1)-O(7)          | 2.878(4)   | B(5)#2-O(3)        | 1.474(4)  |
| B(1)-O(1)          | 1.371(4)   | B(5)-O(3)#6        | 1.474(4)  |
| B(1)-O(4)          | 1.377(4)   | B(5)-O(3)#2        | 1.474(4)  |
| B(1)-O(8)          | 1.349(4)   | B(5)-O(7)#1        | 1.459(4)  |
| B(2)-O(2)          | 1.375(4)   | B(5)-O(7)          | 1.459(4)  |
| B(2)-O(3)          | 1.327(4)   | B(6)-O(1)          | 1.380(4)  |
| B(2)#1-O(5)        | 1.392(4)   | B(6)-O(6)          | 1.345(4)  |
| B(2)-O(5)#1        | 1.392(4)   | B(6)#5-O(9)        | 1.373(4)  |
| B(3)-O(2)          | 1.358(4)   | B(6)-O(9)#3        | 1.373(4)  |
| O(1)-H(1)          | 0.858(4)   | O(7)-K(1)-O(1)#1   | 61.81(6)  |
| O(5)-K(1)-O(5)#1   | 173.75(10) | O(2)#1-K(1)-O(1)#1 | 91.38(9)  |
| O(5)-K(1)-O(7)#1   | 96.72(7)   | O(2)-K(1)-O(1)#1   | 103.67(9) |
| O(5)#1-K(1)-O(7)#1 | 77.50(7)   | O(1)-K(1)-O(1)#1   | 150.12(9) |
| O(5)-K(1)-O(7)     | 77.50(6)   | O(8)-B(1)-O(1)     | 118.2(3)  |
| O(5)#1-K(1)-O(7)   | 96.72(7)   | O(8)-B(1)-O(4)     | 121.3(3)  |
| O(7)#1-K(1)-O(7)   | 48.27(10)  | O(1)-B(1)-O(4)     | 120.4(3)  |
| O(5)-K(1)-O(2)#1   | 48.18(8)   | O(3)-B(2)-O(2)     | 126.2(3)  |
| O(5)#1-K(1)-O(2)#1 | 136.20(8)  | O(3)-B(2)-O(5)#1   | 122.3(3)  |
| O(7)#1-K(1)-O(2)#1 | 140.16(7)  | O(2)-B(2)-O(5)#1   | 111.5(3)  |
| O(7)-K(1)-O(2)#1   | 98.86(9)   | O(2)-B(3)-O(9)     | 122.4(3)  |
| O(5)-K(1)-O(2)     | 136.20(8)  | O(2)-B(3)-O(4)#5   | 117.1(3)  |
| O(5)#1-K(1)-O(2)   | 48.18(8)   | O(9)-B(3)-O(4)#5   | 120.4(3)  |
| O(7)#1-K(1)-O(2)   | 98.86(9)   | O(7)#4-B(4)-O(6)   | 119.2(3)  |
| O(7)-K(1)-O(2)     | 140.16(7)  | O(7)#4-B(4)-O(5)   | 121.5(3)  |
| O(2)#1-K(1)-O(2)   | 119.33(12) | O(6)-B(4)-O(5)     | 119.1(3)  |
| O(5)-K(1)-O(1)     | 61.19(6)   | O(7)-B(5)-O(7)#1   | 107.5(4)  |

---

|                    |           |                    |            |
|--------------------|-----------|--------------------|------------|
| O(5)#1-K(1)-O(1)   | 116.99(7) | O(7)-B(5)-O(3)#6   | 111.90(13) |
| O(7)#1-K(1)-O(1)   | 61.81(6)  | O(7)#1-B(5)-O(3)#6 | 108.91(13) |
| O(7)-K(1)-O(1)     | 90.10(8)  | O(7)-B(5)-O(3)#2   | 108.91(13) |
| O(2)#1-K(1)-O(1)   | 103.67(9) | O(7)#1-B(5)-O(3)#2 | 111.90(13) |
| O(2)-K(1)-O(1)     | 91.38(9)  | O(3)#6-B(5)-O(3)#2 | 107.7(4)   |
| O(5)-K(1)-O(1)#1   | 116.99(6) | O(6)-B(6)-O(9)#3   | 116.9(3)   |
| O(5)#1-K(1)-O(1)#1 | 61.18(6)  | O(6)-B(6)-O(1)     | 123.8(3)   |
| O(7)#1-K(1)-O(1)#1 | 90.10(8)  | O(9)#3-B(6)-O(1)   | 119.4(3)   |

---

Symmetry transformations used to generate equivalent atoms:

|                      |                            |                            |
|----------------------|----------------------------|----------------------------|
| #1 $-x+1, y, -z+1/2$ | #2 $-x+1, -y, -z+1$        | #3 $-x+1/2, y-1/2, -z+1/2$ |
| #4 $-x+1, -y, -z$    | #5 $-x+1/2, y+1/2, -z+1/2$ | #6 $x, -y, z-1/2$          |



**Table S3b.** Selected bond lengths (Å) and angles (°) for CsB<sub>11</sub>O<sub>16</sub>(OH)<sub>2</sub>.

|                     |            |                     |            |
|---------------------|------------|---------------------|------------|
| Cs(1)-O(1)          | 3.253(4)   | B(2)-O(3)           | 1.320(8)   |
| Cs(1)-O(1)#1        | 3.253(4)   | B(2)#1-O(5)         | 1.395(8)   |
| Cs(1)-O(2)          | 3.072(4)   | B(3)-O(2)           | 1.353(8)   |
| Cs(1)-O(2)#1        | 3.072(4)   | B(3)#3-O(4)         | 1.376(8)   |
| Cs(1)-O(5)          | 3.065(4)   | B(3)-O(9)           | 1.366(9)   |
| Cs(1)-O(5)#1        | 3.065(4)   | B(4)-O(5)           | 1.359(8)   |
| Cs(1)-O(7)          | 3.213(5)   | B(4)-O(6)           | 1.384(8)   |
| Cs(1)-O(7)#1        | 3.213(5)   | B(4)#4-O(7)         | 1.337(8)   |
| Cs(1)-O(8)          | 3.722(5)   | B(5)#2-O(3)         | 1.499(7)   |
| Cs(1)-O(8)#1        | 3.722(5)   | B(5)-O(7)           | 1.460(7)   |
| B(1)-O(1)           | 1.388(8)   | B(6)-O(1)           | 1.360(9)   |
| B(1)-O(4)           | 1.364(9)   | B(6)-O(6)           | 1.363(8)   |
| B(1)-O(8)           | 1.361(9)   | B(6)#5-O(9)         | 1.382(9)   |
| B(2)-O(2)           | 1.378(8)   | O(1)-H(1)           | 0.861(4)   |
| O(5)-Cs(1)-O(5)#1   | 165.95(17) | O(7)#1-Cs(1)-O(8)   | 68.31(11)  |
| O(5)-Cs(1)-O(2)     | 144.96(11) | O(1)-Cs(1)-O(8)     | 38.65(10)  |
| O(5)#1-Cs(1)-O(2)   | 43.99(11)  | O(1)#1-Cs(1)-O(8)   | 139.20(11) |
| O(5)-Cs(1)-O(2)#1   | 43.99(11)  | O(5)-Cs(1)-O(8)#1   | 87.62(10)  |
| O(5)#1-Cs(1)-O(2)#1 | 144.96(11) | O(5)#1-Cs(1)-O(8)#1 | 91.89(10)  |
| O(2)-Cs(1)-O(2)#1   | 132.13(17) | O(2)-Cs(1)-O(8)#1   | 121.82(11) |
| O(5)-Cs(1)-O(7)     | 74.08(11)  | O(2)#1-Cs(1)-O(8)#1 | 60.07(10)  |
| O(5)#1-Cs(1)-O(7)   | 92.69(11)  | O(7)-Cs(1)-O(8)#1   | 68.31(11)  |
| O(2)-Cs(1)-O(7)     | 131.54(11) | O(7)#1-Cs(1)-O(8)#1 | 107.74(11) |
| O(2)#1-Cs(1)-O(7)   | 95.22(11)  | O(1)-Cs(1)-O(8)#1   | 139.20(11) |
| O(5)-Cs(1)-O(7)#1   | 92.69(11)  | O(1)#1-Cs(1)-O(8)#1 | 38.65(10)  |
| O(5)#1-Cs(1)-O(7)#1 | 74.08(11)  | O(8)-Cs(1)-O(8)#1   | 176.00(17) |
| O(2)-Cs(1)-O(7)#1   | 95.22(11)  | O(8)-B(1)-O(4)      | 121.8(6)   |
| O(2)#1-Cs(1)-O(7)#1 | 131.54(11) | O(8)-B(1)-O(1)      | 117.5(6)   |
| O(7)-Cs(1)-O(7)#1   | 43.29(14)  | O(4)-B(1)-O(1)      | 120.7(6)   |
| O(5)-Cs(1)-O(1)     | 56.80(10)  | O(3)-B(2)-O(2)      | 125.8(6)   |
| O(5)#1-Cs(1)-O(1)   | 117.62(11) | O(3)-B(2)-O(5)#1    | 122.2(6)   |
| O(2)-Cs(1)-O(1)     | 98.71(11)  | O(2)-B(2)-O(5)#1    | 112.0(5)   |
| O(2)#1-Cs(1)-O(1)   | 97.29(11)  | O(2)-B(3)-O(9)      | 122.2(6)   |
| O(7)-Cs(1)-O(1)     | 81.97(11)  | O(2)-B(3)-O(4)#5    | 117.4(6)   |
| O(7)#1-Cs(1)-O(1)   | 60.13(11)  | O(9)-B(3)-O(4)#5    | 120.4(6)   |

|                     |            |                    |          |
|---------------------|------------|--------------------|----------|
| O(5)-Cs(1)-O(1)#1   | 117.62(11) | O(7)#4-B(4)-O(5)   | 121.7(6) |
| O(5)#1-Cs(1)-O(1)#1 | 56.80(10)  | O(7)#4-B(4)-O(6)   | 117.6(6) |
| O(2)-Cs(1)-O(1)#1   | 97.29(11)  | O(5)-B(4)-O(6)     | 120.4(6) |
| O(2)#1-Cs(1)-O(1)#1 | 98.71(11)  | O(7)#1-B(5)-O(7)   | 108.5(8) |
| O(7)-Cs(1)-O(1)#1   | 60.13(11)  | O(7)#1-B(5)-O(3)#6 | 109.4(2) |
| O(7)#1-Cs(1)-O(1)#1 | 81.97(11)  | O(7)-B(5)-O(3)#6   | 111.1(2) |
| O(1)-Cs(1)-O(1)#1   | 139.87(16) | O(7)#1-B(5)-O(3)#2 | 111.1(2) |
| O(5)-Cs(1)-O(8)     | 91.89(10)  | O(7)-B(5)-O(3)#2   | 109.4(2) |
| O(5)#1-Cs(1)-O(8)   | 87.62(10)  | O(3)#6-B(5)-O(3)#2 | 107.3(7) |
| O(2)-Cs(1)-O(8)     | 60.07(10)  | O(1)-B(6)-O(6)     | 124.9(7) |
| O(2)#1-Cs(1)-O(8)   | 121.82(11) | O(1)-B(6)-O(9)#3   | 120.5(6) |
| O(7)-Cs(1)-O(8)     | 107.74(11) | O(6)-B(6)-O(9)#3   | 114.6(7) |

Symmetry transformations used to generate equivalent atoms:

|                            |                     |
|----------------------------|---------------------|
| #1 $-x+1, y, -z+1/2$       | #2 $-x+1, -y, -z+1$ |
| #3 $-x+1/2, y-1/2, -z+1/2$ | #4 $-x+1, -y, -z$   |
| #5 $-x+1/2, y+1/2, -z+1/2$ | #6 $x, -y, z-1/2$   |

**Table 4.** The hydroxyl potassium borates.

| No. | Compounds                                                                 | Space group       | B-O anionic framework                                       | Cutoff edge | Reference |
|-----|---------------------------------------------------------------------------|-------------------|-------------------------------------------------------------|-------------|-----------|
| 1   | $\text{KB}_{11}\text{O}_{16}(\text{OH})_2^*$                              | <i>C2/c</i>       | $2_{\infty}[\text{B}_{11}\text{O}_{18}(\text{OH})_2]$ layer | 195 nm      | /         |
| 2   | $\text{K}_2(\text{B}_5\text{O}_8(\text{OH}))(\text{H}_2\text{O})_2$       | <i>Pna2_1</i>     | $2_{\infty}[\text{B}_5\text{O}_{10}(\text{OH})]$ layer      | /           | 7         |
| 3   | $\text{K}_2(\text{B}_{10}\text{O}_{14}(\text{OH})_4)(\text{H}_2\text{O})$ | <i>P\bar{1}</i>   | $1_{\infty}[\text{B}_5\text{O}_8(\text{OH})_2]$ chain       | /           | 8         |
| 4   | $\text{KB}_5\text{O}_7(\text{OH})_2(\text{H}_2\text{O})$                  | <i>P2_1/c</i>     | $1_{\infty}[\text{B}_5\text{O}_7(\text{OH})_2]$ chain       | /           | 9         |
| 5   | $\text{K}_2(\text{B}_6\text{O}_9(\text{OH})_2)$                           | <i>P2_1/c</i>     | $1_{\infty}[\text{B}_6\text{O}_9(\text{OH})_2]$ chain       | /           | 10        |
| 6   | $\text{KB}_5\text{O}_7(\text{OH})_2$                                      | <i>P2_1/c</i>     | $1_{\infty}[\text{B}_5\text{O}_7(\text{OH})_2]$ chain       | /           | 11        |
| 7   | $\text{K}_4\text{B}_{10}\text{O}_{15}(\text{OH})_4$                       | <i>C2/c</i>       | $1_{\infty}[\text{B}_5\text{O}_{10}(\text{OH})_2]$ chain    | /           | 9         |
| 8   | $\text{K}_3\text{B}_5\text{O}_8(\text{OH})_2$                             | <i>Fdd2</i>       | Isolated $[\text{B}_5\text{O}_8(\text{OH})_2]$              | 200 nm      | 12        |
| 9   | $\text{K}(\text{B}_5\text{O}_6(\text{OH})_4)(\text{H}_2\text{O})_2$       | <i>Aba2</i>       | Isolated $[\text{B}_5\text{O}_6(\text{OH})_4]$              | /           | 13        |
| 10  | $\text{KB}_3\text{O}_4(\text{OH})_2$                                      | <i>P4/ncc</i>     | isolated $[\text{B}_{12}\text{O}_{16}(\text{OH})_8]$        | /           | 14        |
| 11  | $\text{K}_2(\text{B}_4\text{O}_5(\text{OH})_4)(\text{H}_2\text{O})_2$     | <i>P2_12_12_1</i> | Isolated $[\text{B}_4\text{O}_5(\text{OH})_4]$              | /           | 15        |
| 12  | $\text{K}_2(\text{B}_3\text{O}_3(\text{OH})_5)$                           | <i>Ama2</i>       | Isolated $[\text{B}_3\text{O}_3(\text{OH})_5]$              | 200 nm      | 16        |
| 13  | $\text{K}_3\text{B}_3\text{O}_4(\text{OH})_4(\text{H}_2\text{O})_2$       | <i>Cmc2_1</i>     | Isolated $[\text{B}_3\text{O}_4(\text{OH})_4]$              | 190 nm      | 17        |
| 14  | $\text{K}(\text{B}_5\text{O}_8)(\text{H}_2\text{O})_4$                    | <i>Aba2</i>       | Isolated $[\text{B}_5\text{O}_8(\text{OH})_2]$              | /           | 18        |
| 15  | $\text{K}_2(\text{B}_{12}(\text{OH})_{12})$                               | <i>P2_1/c</i>     | Isolated $[\text{BOH}]$                                     | /           | 19        |
| 16  | $\text{KB}_3\text{O}_5(\text{H}_2\text{O})_3$                             | <i>C2/c</i>       | Isolated $[\text{B}_3\text{O}_3(\text{OH})_4]$              | /           | 20        |
| 17  | $\text{K}_2\text{B}_4\text{O}_5(\text{OH})_4$                             | <i>Pbcn</i>       | isolated $[\text{B}_4\text{O}_5(\text{OH})_4]$              | /           | 21        |

\* represents the work

*Note:* the above compounds are all derived from the Inorganic Crystal Structure Database (ICSD), and all hydroxyl potassium borates except for disordered repetition and other irrational structure are summarized.

**Table S5.** The hydroxyl cesium borates.

| No. | Compounds                                                                                         | Space group             | B-O anionic framework                                                                | Cutoff edge | Reference |
|-----|---------------------------------------------------------------------------------------------------|-------------------------|--------------------------------------------------------------------------------------|-------------|-----------|
| 1   | CsB <sub>11</sub> O <sub>16</sub> (OH) <sub>2</sub> *                                             | <i>C2/c</i>             | <sup>2</sup> <sub>∞</sub> [B <sub>11</sub> O <sub>18</sub> (OH) <sub>2</sub> ] layer | /           | /         |
| 2   | Cs <sub>0.4</sub> (H <sub>3</sub> O) <sub>0.6</sub> B <sub>3</sub> O <sub>5</sub>                 | <i>C2/c</i>             | <sup>2</sup> <sub>∞</sub> [B <sub>3</sub> O <sub>7</sub> (H <sub>3</sub> O)] layer   | /           | 22        |
| 3   | CsB <sub>7</sub> O <sub>10</sub> (OH) <sub>2</sub>                                                | <i>C2/c</i>             | <sup>2</sup> <sub>∞</sub> [B <sub>7</sub> O <sub>10</sub> (OH) <sub>2</sub> ] layer  | 188 nm      | 23        |
| 4   | Cs <sub>2</sub> (B <sub>4</sub> O <sub>5</sub> (OH) <sub>4</sub> )(H <sub>2</sub> O) <sub>3</sub> | <i>P2<sub>1</sub>/c</i> | Isolated [B <sub>4</sub> O <sub>5</sub> (OH) <sub>4</sub> ]                          | /           | 24        |
| 5   | Cs <sub>2</sub> (B <sub>12</sub> (OH) <sub>12</sub> )(H <sub>2</sub> O) <sub>2</sub>              | <i>P2<sub>1</sub>/c</i> | Isolated [B <sub>12</sub> (OH) <sub>12</sub> ]                                       | /           | 25        |
| 6   | Cs(B <sub>5</sub> O <sub>6</sub> (OH) <sub>4</sub> )(H <sub>2</sub> O) <sub>2</sub>               | <i>C2/c</i>             | Isolated [B <sub>5</sub> O <sub>6</sub> (OH) <sub>4</sub> ]                          | /           | 26        |
| 7   | Cs(B <sub>5</sub> O <sub>6</sub> (OH) <sub>4</sub> )(H <sub>2</sub> O) <sub>2</sub>               | <i>P2<sub>1</sub>/c</i> | Isolated [B <sub>5</sub> O <sub>6</sub> (OH) <sub>4</sub> ]                          | /           | 27        |

\* represents the work

*Note:* the above compounds are all derived from ICSD, and all hydroxyl cesium borates except for disordered repetition and other irrational structure are summarized.

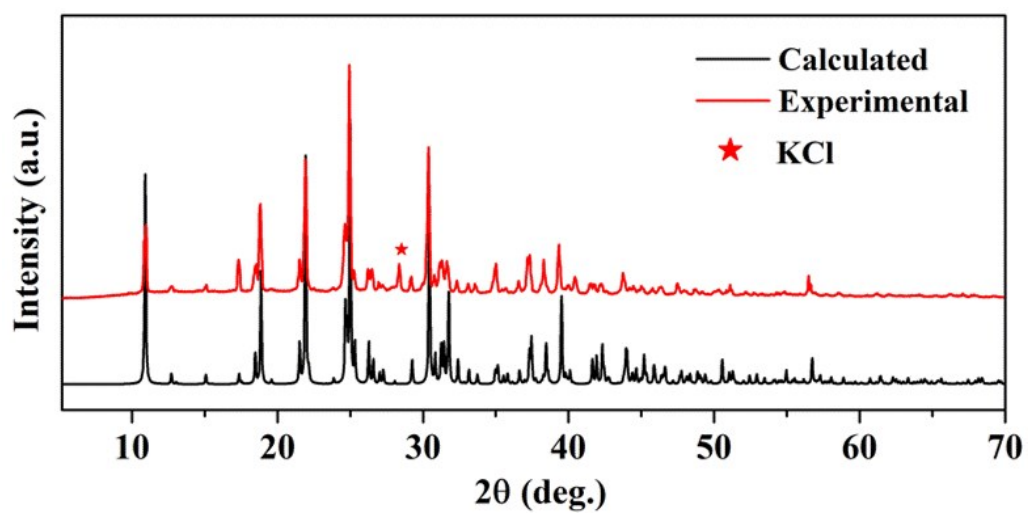

**Figure S1.** Experimental and calculated XRD patterns of  $\text{KB}_{11}\text{O}_{16}(\text{OH})_2$ .

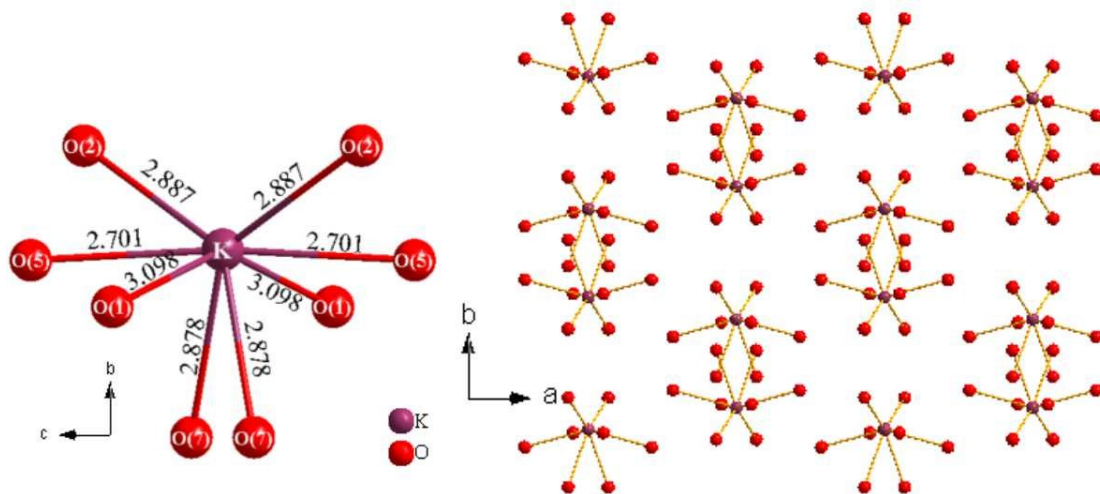

**Figure S2.** The coordination environments of the K cations.

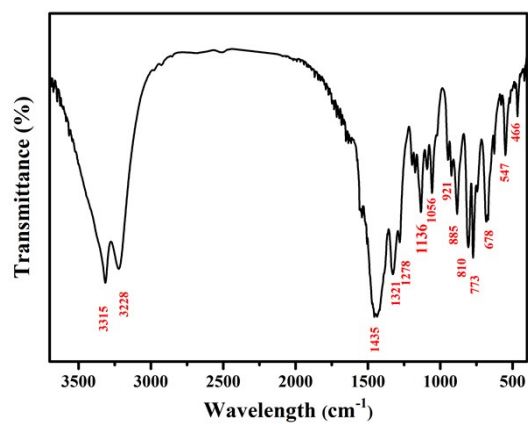

**Figure S3.** The IR spectrum of  $\text{KB}_{11}\text{O}_{16}(\text{OH})_2$ .

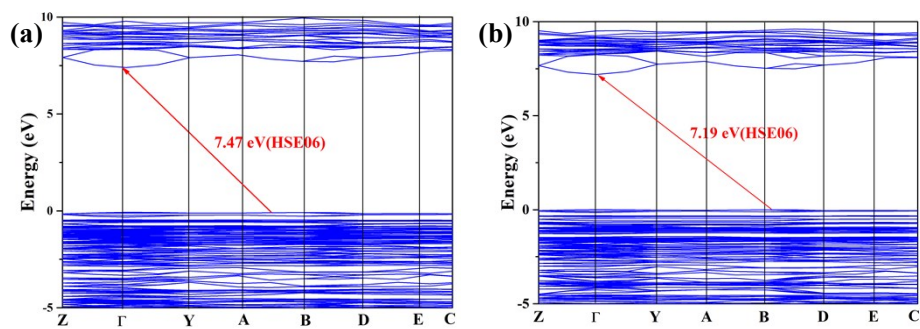

**Figure S4.** Calculated electronic band structures based on HSE06 for (a) KBOH, and (b) CBOH.



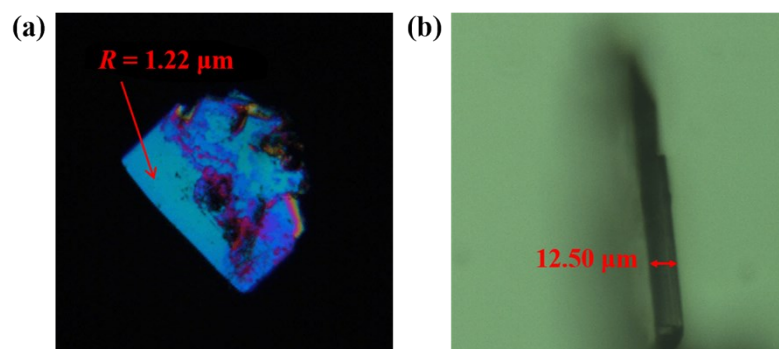

**Figure S5.** A  $\text{KB}_{11}\text{O}_{16}(\text{OH})_2$  single crystal under the polarizing microscope (a); The thickness of  $\text{KB}_{11}\text{O}_{16}(\text{OH})_2$  crystal (b).

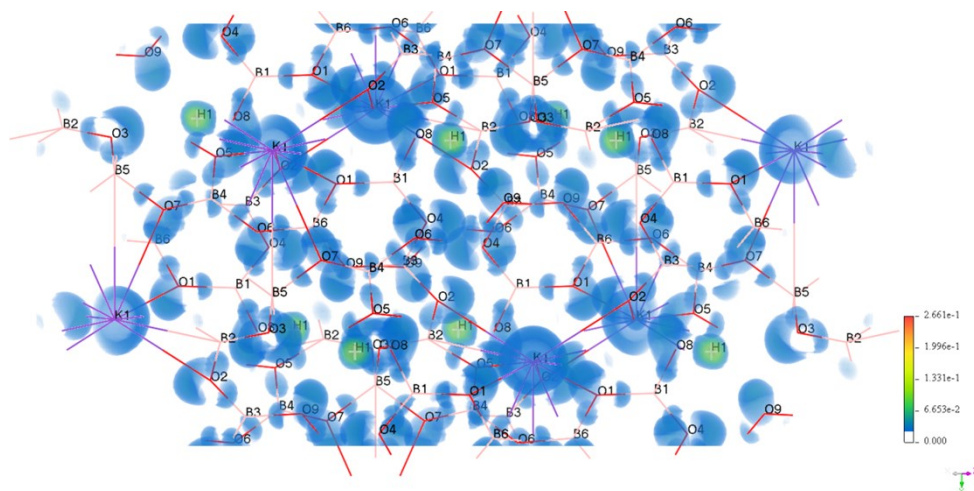

**Figure S6.** The Electron localization function (ELF) of  $\text{KB}_{11}\text{O}_{16}(\text{OH})_2$ .

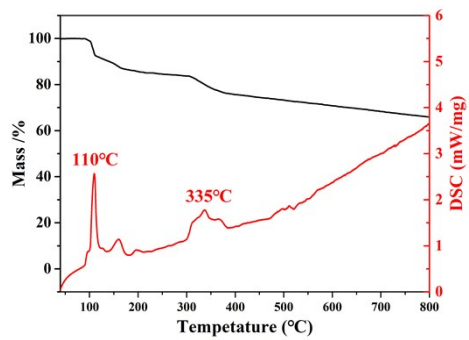

**Figure S7.** The TG/DSC curves for KBOH.

---

## REFERENCES

- (1) Sheldrick, G. M. A short history of SHELX. *Acta Cryst.* **2008**, *64*, 112-122.
- (2) Spek, A. L. Single-crystal structure validation with the program PLATON. *J. Appl. Cryst.* **2003**, *36*, 7-13.
- (3) Tauc, J. Absorption edge and internal electric fields in amorphous semiconductors. *Mater. Res. Bull.* **1970**, *5*, 721-722.
- (4) Segall, M. D.; Lindan, P. J. D.; Probert, M. J.; Pickard, C. J.; Hasnip, P. J.; Clark, S. J.; Payne, M. C. First-principles simulation: ideas, illustrations and the CASTEP code. *J. Phys.: Condens Matter* **2002**, *14*, 2717-2744.
- (5) Hamann, D. R.; Schlüter, M.; Chiang, C. Norm-conserving pseudopotentials. *Phys. Rev. Lett.* **1979**, *43*, 1494
- (6) Perdew, J. P.; Burke, K.; Ernzerhof, M. Generalized gradient approximation made simple. *Phys. Rev. Lett.* **1996**, *77*, 3865-3868.
- (7) Marezio, M. Crystal structure of  $K_2B_5O_8(OH) \cdot 2H_2O$ . *Acta Crystallogr B* **1969**, *B25*, 1787-1788.
- (8) Gao, Y.-H. Potassium decaborate monohydrate. *Acta Crystallogr E* **2011**, *67*, I57-U204.
- (9) Zhang, H. X.; Zhang, J.; Zheng, S. T.; Yang, G. Y. Two new potassium borates,  $K_4B_{10}O_{15}(OH)_4$  with stepped chain and  $KB_5O_7(OH)_2 \cdot H_2O$  with double helical chain. *Cryst. Growth Des.* **2005**, *5*, 157-161.
- (10) Li, H.-J.; Liu, Z.-H.; Sun, L.-M. Synthesis, crystal structure, vibrational spectroscopy and thermal behavior of the first alkali metal hydrated hexaborate:  $K_2B_6O_9(OH)_2$ . *Chin. J. Chem.* **2007**, *25*, 1131-1134.
- (11) Wu, Q. Potassium pentaborate. *Acta Crystallogr E* **2011**, *67*, I67-168.
- (12) Ding, F. H.; Nisbet, M. L.; Zhang, W. G.; Halasyamani, P. S.; Chai, L. Y.; Poeppelmeier, K. R. Why some noncentrosymmetric borates do not make good nonlinear optical materials: a case study with  $K_3B_5O_8(OH)_2$ . *Inorg. Chem.* **2018**, *57*, 11801-11808.
- (13) Ashmore, J. P.; Petch, H. E. Hydrogen positions in potassium pentaborate tetrahydrate as determined by neutron diffraction. *Can. J. Phys.* **1970**, *48*, 1091-1092.
- (14) Wang, G.-M.; Sun, Y.-Q.; Zheng, S.-T.; Yang, G.-Y. Synthesis and crystal structure of a novel potassium borate with an unprecedented  $[B_{12}O_{16}(OH)_8]^{4-}$  anion. *Z. Anorg. Allg. Chem.* **2006**, *632*, 1586-1590.
- (15) Marezio, M.; Zachariasen, W. H.; Plettinger, H. A. The crystal structure of potassium tetraborate tetrahydrate. *Acta Crystallogr.* **1963**, *16*, 975-977.
- (16) Wang, Q.; Lin, C. S.; Zou, G. H.; Liu, M. H.; Gao, D. J.; Bi, J.; Huang, L.  $K_2B_3O_3(OH)_5$ : A new deep-UV nonlinear optical crystal with isolated  $[B_3O_3(OH)_5]^{2-}$  anionic groups. *J. Alloys Compd.* **2018**, *735*, 677-683.
- (17) Liu, Q.; Zhang, X. Y.; Yang, Z. H.; Zhang, F. F.; Liu, L. L.; Han, J.; Li, Z.; Pan, S. L.  $K_3B_3O_4(OH)_4 \cdot 2H_2O$ : A UV nonlinear optical crystal with isolated  $[B_3O_4(OH)_4]^{3-}$  anion groups. *Inorg. Chem.* **2016**, *55*, 8744-8749.
- (18) Zachariasen, W. H.; Plettinger, H. A. Refinement of the structure of potassium pentaborate tetrahydrate. *Acta Crystallogr.* **1963**, *16*, 376-777.
- (19) Peymann, T.; Knobler, C. B.; Khan, S. I.; Hawthorne, M. F. Dodecahydroxy-closo-dodecaborate(2-). *J. Am. Chem. Soc.* **2001**, *123*, 2182-2185.

- 
- (20) Salentine, C. G. Synthesis, characterization and crystal structure of a new potassium borate,  $\text{KB}_3\text{O}_5 \cdot 3\text{H}_2\text{O}$ . *Inorg. Chem.* **1987**, 26, 128-132.
- (21) Shi, T. T.; Zhang, F. F.; Tudi, A.; Yang, Z. H.; Pan, S. L.  $\text{K}_2\text{B}_4\text{O}_5(\text{OH})_4 \cdot \text{H}_2\text{O}$  and  $\text{K}_2\text{B}_4\text{O}_5(\text{OH})_4$ : two new hydrated potassium borates with isolated  $[\text{B}_4\text{O}_5(\text{OH})_4]^{2-}$  units and different structural frameworks. *New J. Chem.* **2019**, 43, 11660-11665.
- (22) Sohr, G.; Neumair, S. C.; Heymann, G.; Wurst, K.; Guenne, J. S. A. D.; Huppertz, H. Oxonium ions substituting cesium ions in the structure of the new high-pressure borate  $\text{HP-Cs-x}(\text{H}_3\text{O})(\text{x})\text{B}_3\text{O}_5$  ( $\text{x}=0.5-0.7$ ). *Chem. Eur. J.* **2014**, 20, 4316-4323.
- (23) Miao, Z. H.; Yang, Y.; Wei, Z. L.; Yang, Z. H.; Pan, S. L. Effect of anion dimensionality on optical properties: the  $_{\infty}[\text{B}_7\text{O}_{10}(\text{OH})_2]$  layer in  $\text{CsB}_7\text{O}_{10}(\text{OH})_2$  vs. the  $_{\infty}[\text{B}_7\text{O}_{12}]$  framework in  $\text{CsBaB}_7\text{O}_{12}$ . *Dalton Trans.* **2020**, 49, 1292-1299.
- (24) Touboul, M.; Penin, N.; Nowogrocki, G. Crystal structure and thermal behavior of  $\text{Cs}_2\text{B}_4\text{O}_5(\text{OH})_4 \cdot 3\text{H}_2\text{O}$ . *J. Solid State Chem.* **1999**, 143, 260-265.
- (25) Peymann, T.; Herzog, A.; Knobler, C. B.; Hawthorne, M. F. Aromatic polyhedral hydroxyborates: Bridging boron oxides and boron hydrides. *Angew. Chem. Int. Ed.* **1999**, 38, 1062-1064.
- (26) Penin, N.; Seguin, L.; Gerand, B.; Touboul, M.; Nowogrocki, G. Crystal structure of a new form of  $\text{CsB}_5\text{O}_6(\text{OH})_4 \cdot 2\text{H}_2\text{O}$  and thermal behavior of  $\text{M B}_5\text{O}_6(\text{OH})_4 \cdot 2\text{H}_2\text{O}$  ( $\text{M} = \text{Cs, Rb, Tl}$ ). *J. Alloys Compd.* **2002**, 334, 97-109.
- (27) Behm, H. Structure determination on a twinned crystal of cesium pentaborate tetrahydrate,  $\text{CsB}_5\text{O}_6(\text{OH})_4 \cdot 2\text{H}_2\text{O}$ . *Acta Crystallogr Sec C* **1984**, 40, 1114-1116.
